# Supplementary material for: DNA interaction of ruthenium(ii) complexes with imidazo[4,5-f][1,10]phenanthroline derivatives
Source: Royal Society of Chemistry journal article supplement (doi:10.1039/c9dt00454h), 2019-01-01
Supplement: c9dt00454h1.pdf [file c9dt00454h1.pdf]

Supporting Information

**DNA interaction of ruthenium(II) complexes with imidazo[4,5-  
f][1,10]phenanthroline derivatives**

Bole Yu, ‡<sup>a</sup> Thomas W. Rees, ‡<sup>a</sup> Jiewen Liang,<sup>a</sup> Chengzhe Jin,<sup>a</sup> Yu Chen,<sup>\*a</sup>  
Liangnian Ji,<sup>a</sup> Hui Chao<sup>\*ab</sup>

<sup>a</sup> MOE Key Laboratory of Bioinorganic and Synthetic Chemistry, School of  
Chemistry, Sun Yat-Sen University, Guangzhou, 510275, P. R. China

<sup>b</sup> College of Chemistry and Environmental Engineering, Shenzhen University,  
Shenzhen 518055, P. R. China.

‡ These authors contributed equally to this work.

## Table of Contents

- Table S1.** Crystal data and structural refinement for complex **2**.
- Table S2.** Selected bond lengths (Å) and angles (°) for complex **2**.
- Fig. S1.** X-ray crystal structure of complex **2**. The H atoms, counter anion and solvent have been omitted for clarity. Only the major conformation of the disorder is shown in this figure.
- Fig. S2.** <sup>1</sup>H NMR spectra of complex **2**.
- Fig. S3.** Absorption spectra of complex **1** at 20 μM (a), 10 μM (b) and 4 μM (c) upon addition of CT-DNA. Arrows indicate the change in absorbance upon increasing the DNA concentration. Insert: Plot of  $(\epsilon_a - \epsilon_f)/(\epsilon_b - \epsilon_f)$  vs [DNA] for the titration of DNA to complex **1**.
- Fig. S4.** Absorption spectra of complex **3** at 20 μM (a), 10 μM (b) and 4 μM (c) upon addition of CT-DNA. Arrows indicate the change in absorbance upon increasing the DNA concentration. Insert: Plot of  $(\epsilon_a - \epsilon_f)/(\epsilon_b - \epsilon_f)$  vs [DNA] for the titration of DNA to complex **3**.
- Fig. S5.** Absorption spectra of complex **4** at 20 μM (a), 10 μM (b) and 4 μM (c) upon addition of CT-DNA. Arrows indicate the change in absorbance upon increasing the DNA concentration. Insert: Plot of  $(\epsilon_a - \epsilon_f)/(\epsilon_b - \epsilon_f)$  vs [DNA] for the titration of DNA to complex **4**.
- Fig. S6.** Changes in the absorption spectra of complex **1** (10 μM) under visible irradiation in the presence of CT-DNA (1 mM) at pH 7.0. a) Air-saturated solution, b) Argon-saturated solution. Irradiation: t = 0, 0.5, 1, 2, 3 h.
- Fig. S7.** Changes in the absorption spectra of complex **2** (10 μM) under visible irradiation in the presence of CT-DNA (1 mM) at pH 7.0. a) Air-saturated solution, b) Argon-saturated solution. Irradiation: t = 0, 0.5, 1, 2, 3 h.
- Fig. S8.** Changes in the absorption spectra of complex **3** (10 μM) under visible irradiation in the presence of CT-DNA (1 mM) at pH 7.0. a) Air-saturated solution, b) Argon-saturated solution. Irradiation: t = 0, 0.5, 1, 2, 3 h.
- Fig. S9.** Changes in the absorption spectra of complex **4** (10 μM) under visible irradiation in the presence of CT-DNA (1 mM) at pH 7.0. a) Air-saturated solution, b) Argon-saturated solution. Irradiation: t = 0, 0.5, 1, 2, 3 h.

**Table S1** Crystal data and structure refinement for complex **2**.

---

|                                             |                                                                                           |
|---------------------------------------------|-------------------------------------------------------------------------------------------|
| Empirical formula                           | C <sub>43</sub> H <sub>30</sub> Cl <sub>2</sub> N <sub>8</sub> O <sub>8</sub> Ru          |
| Formula weight                              | 958.72                                                                                    |
| Crystal system                              | orthorhombic                                                                              |
| Space group                                 | Pnma                                                                                      |
| Unit cell dimensions                        | a = 26.3477(2) Å<br>b = 20.8970(2) Å<br>c = 18.0176(2) Å<br>α = 90°<br>β = 90°<br>γ = 90° |
| Volume                                      | 9920.27(16) Å <sup>3</sup>                                                                |
| Z                                           | 8                                                                                         |
| Calculated density                          | 1.284 g/cm <sup>3</sup>                                                                   |
| Absorption coefficient                      | 4.006 mm <sup>-1</sup>                                                                    |
| F(000)                                      | 3888.0                                                                                    |
| Crystal size                                | 0.47 × 0.42 × 0.25 mm <sup>3</sup>                                                        |
| Radiation                                   | Cu Kα (λ = 1.54178)                                                                       |
| θ range for data collection/°               | 6.71 – 125.224                                                                            |
| Index ranges                                | -29 ≤ h ≤ 22<br>-22 ≤ k ≤ 23<br>-19 ≤ l ≤ 20                                              |
| Reflections collected                       | 21833                                                                                     |
| Independent reflections                     | 7939 [R <sub>int</sub> = 0.0315, R <sub>sigma</sub> = 0.0554]                             |
| Data/restraints/parameters                  | 7939 / 72 / 577                                                                           |
| Goodness-of-fit on F <sup>2</sup>           | 0.967                                                                                     |
| Final R indexes [I ≥ 2σ (I)]                | R <sub>1</sub> = 0.0467, wR <sub>2</sub> = 0.1231                                         |
| Final R indexes [all data]                  | R <sub>1</sub> = 0.0666, wR <sub>2</sub> = 0.1297                                         |
| Largest diff. peak/hole / e Å <sup>-3</sup> | 0.92 and -0.90                                                                            |

---

**Table S2** Selected bond lengths (Å) and angles(°) for complex **2**.

|               |            |               |            |
|---------------|------------|---------------|------------|
| Ru1 - N1      | 2.057(4)   | Ru1 - N2      | 2.057(4)   |
| Ru1 - N5      | 2.061(4)   | Ru1 - N6      | 2.050(4)   |
| Ru1 - N7      | 2.053(4)   | Ru1 - N8      | 2.053(4)   |
| N1 - Ru1 - N2 | 79.59(14)  | N1 - Ru1 - N5 | 98.02(14)  |
| N1 - Ru1 - N6 | 89.10(14)  | N1 - Ru1 - N7 | 96.01(14)  |
| N1 - Ru1 - N8 | 173.39(14) | N2 - Ru1 - N5 | 173.53(15) |
| N2 - Ru1 - N6 | 94.43(16)  | N2 - Ru1 - N7 | 90.75(14)  |
| N2 - Ru1 - N8 | 96.17(14)  | N5 - Ru1 - N6 | 79.47(16)  |
| N5 - Ru1 - N7 | 95.50(15)  | N5 - Ru1 - N8 | 86.72(14)  |
| N7 - Ru1 - N8 | 78.89(14)  |               |            |

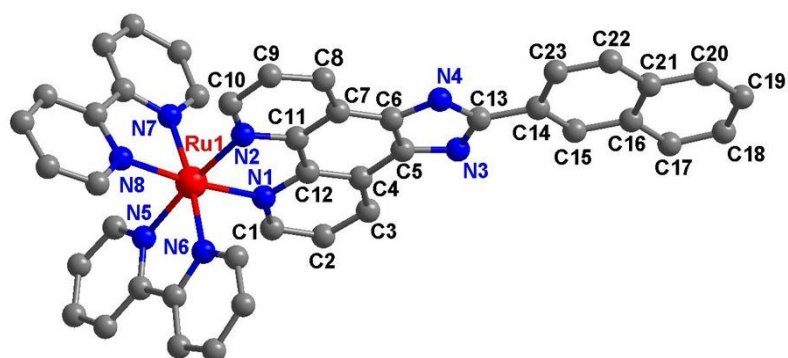

**Fig. S1.** X-ray crystal structure of complex **2**. The H atoms, counter anion and solvent have been omitted for clarity. Only the major conformation of the disorder is shown in this figure.

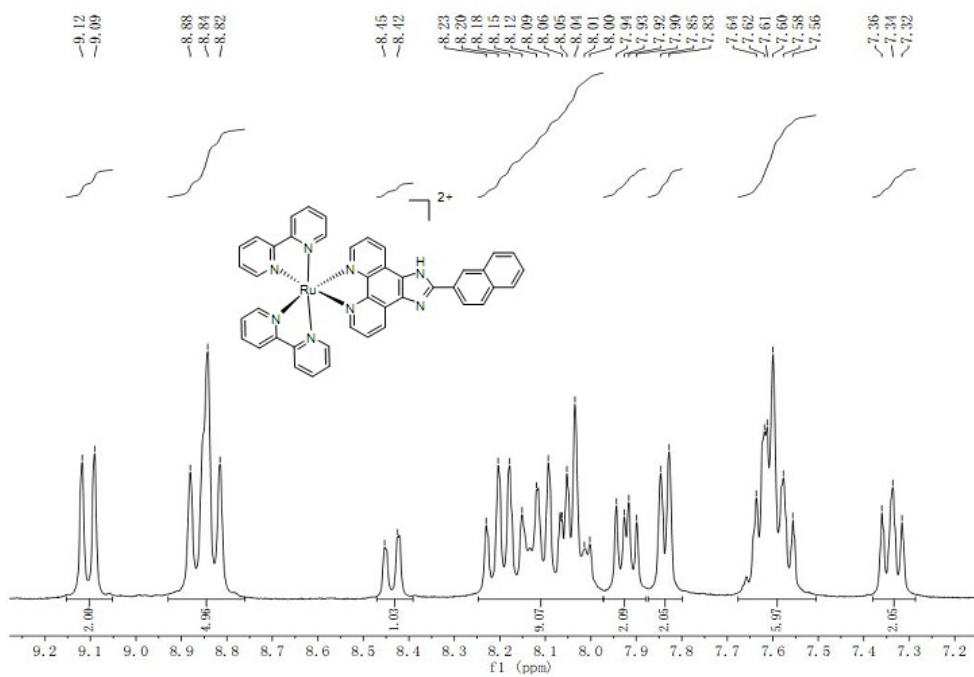

**Fig. S2.** <sup>1</sup>H NMR spectrum of complex 2.

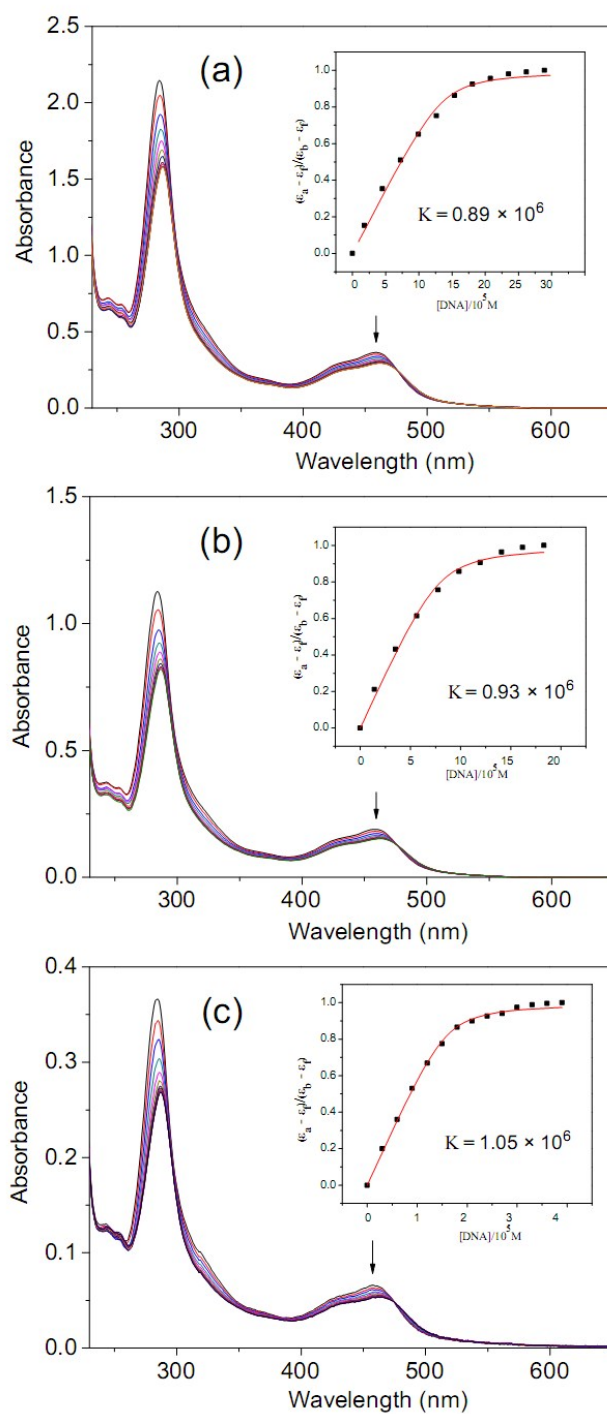

**Fig. S3.** Absorption spectra of complex **1** at 20  $\mu\text{M}$  (a), 10  $\mu\text{M}$  (b) and 4  $\mu\text{M}$  (c) upon addition of CT-DNA. Arrows indicate the change in absorbance upon increasing the DNA concentration. Insert: Plot of  $(\epsilon_a - \epsilon_f)/(\epsilon_b - \epsilon_f)$  vs  $[\text{DNA}]$  for the titration of DNA to complex **1**.

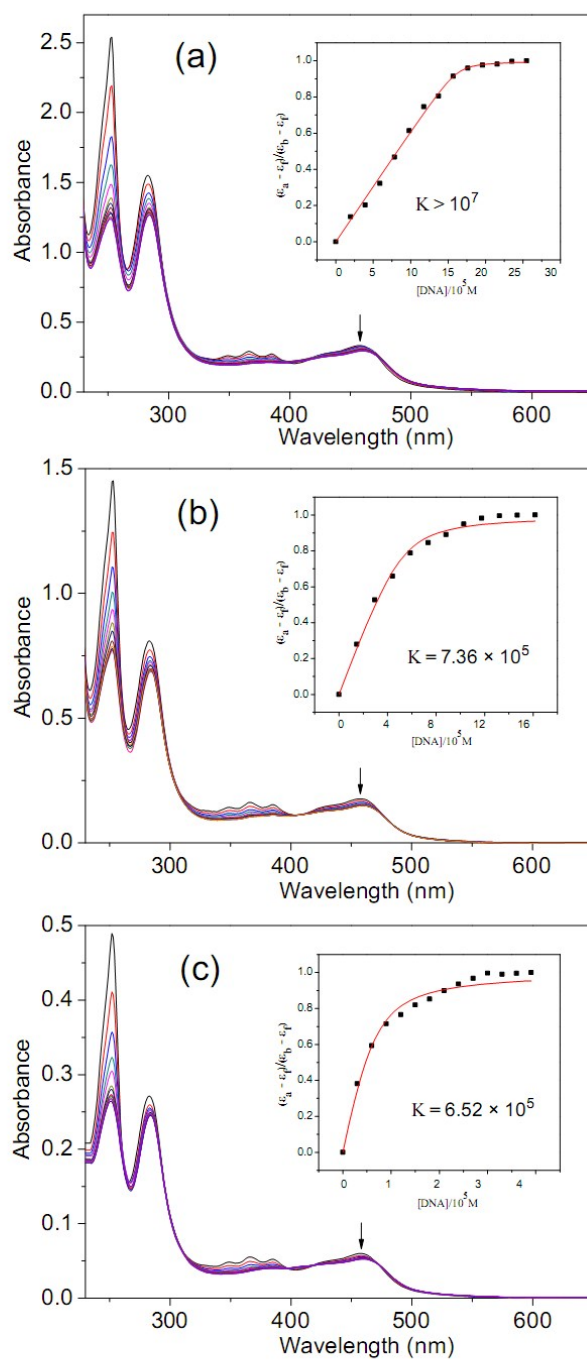

**Fig. S4.** Absorption spectra of complex **3** at 20  $\mu\text{M}$  (a), 10  $\mu\text{M}$  (b) and 4  $\mu\text{M}$  (c) upon addition of CT-DNA. Arrows indicate the change in absorbance upon increasing the DNA concentration. Insert: Plot of  $(\epsilon_a - \epsilon_f)/(\epsilon_b - \epsilon_f)$  vs  $[DNA]$  for the titration of DNA to complex **3**.

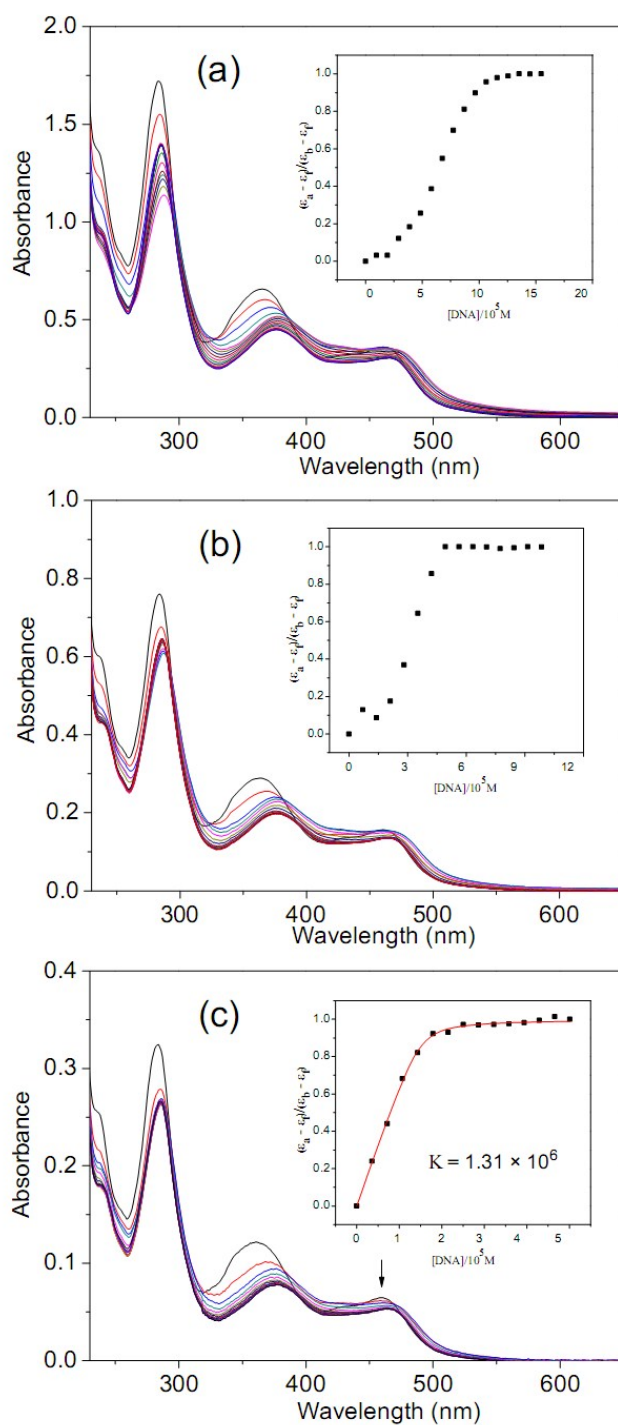

**Fig. S5.** Absorption spectra of complex 4 at 20  $\mu M$  (a), 10  $\mu M$  (b) and 4  $\mu M$  (c) upon addition of CT-DNA. Arrows indicate the change in absorbance upon increasing the DNA concentration. Insert: Plot of  $(\epsilon_a - \epsilon_f)/(\epsilon_b - \epsilon_f)$  vs  $[DNA]$  for the titration of DNA to complex 4.



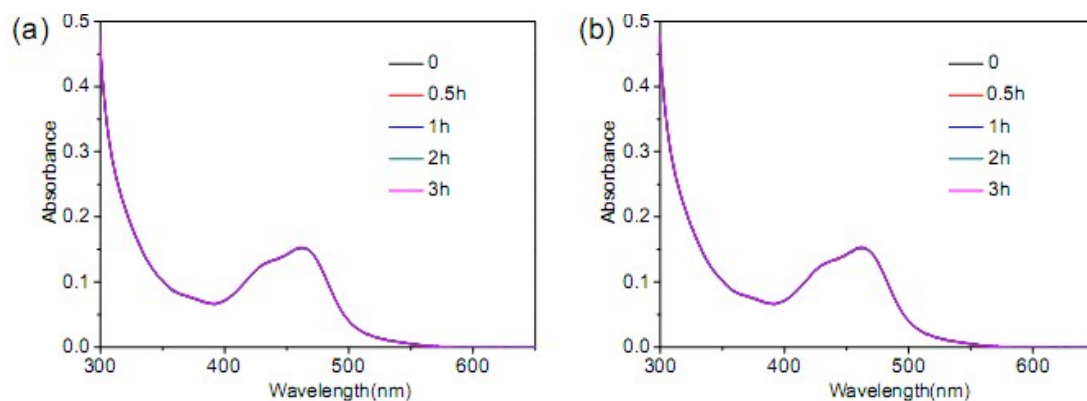

**Fig. S6.** Changes in the absorption spectra of complex **1** ( $10 \mu\text{M}$ ) under visible irradiation in the presence of CT-DNA ( $1 \text{ mM}$ ) at pH 7.0. a) Air-saturated solution, b) Argon-saturated solution. Irradiation:  $t = 0, 0.5, 1, 2, 3 \text{ h}$ .

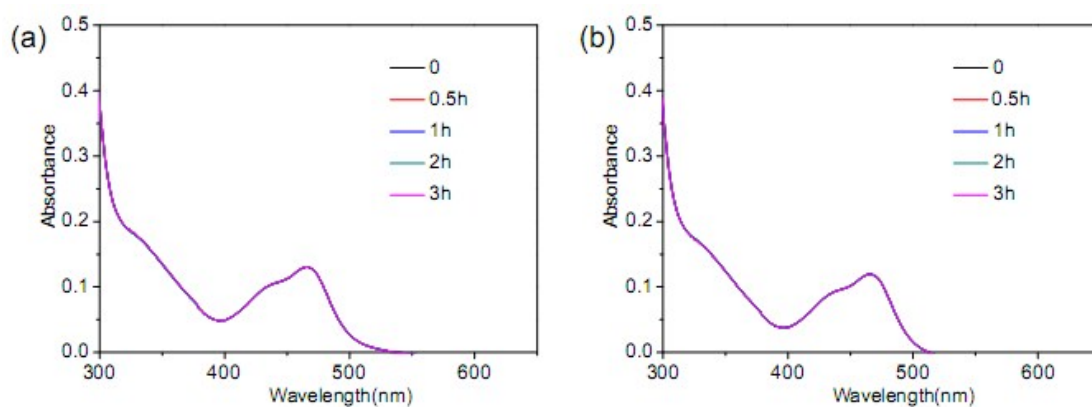

**Fig. S7.** Changes in the absorption spectra of complex **2** ( $10 \mu\text{M}$ ) under visible irradiation in the presence of CT-DNA ( $1 \text{ mM}$ ) at pH 7.0. a) Air-saturated solution, b) Argon-saturated solution. Irradiation:  $t = 0, 0.5, 1, 2, 3 \text{ h}$ .

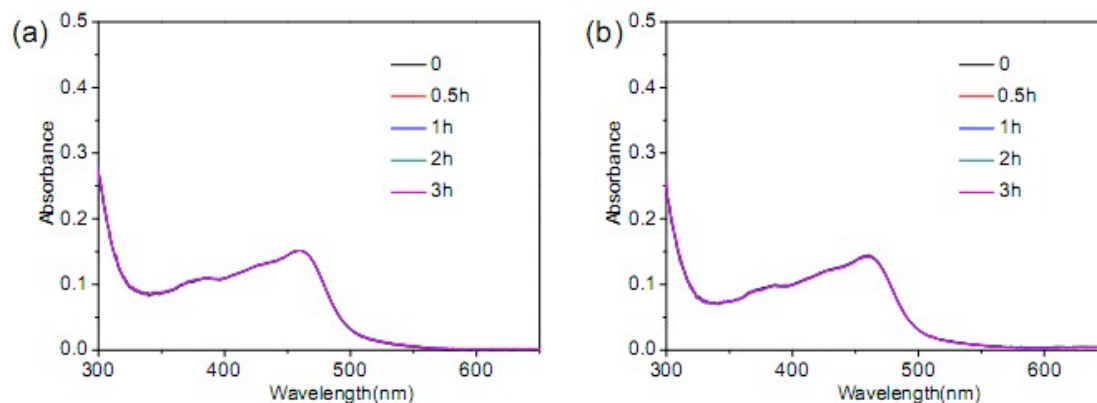

**Fig. S8.** Changes in the absorption spectra of complex 3 ( $10 \mu\text{M}$ ) under visible irradiation in the presence of CT-DNA (1 mM) at pH 7.0. a) Air-saturated solution, b) Argon-saturated solution. Irradiation:  $t = 0, 0.5, 1, 2, 3$  h.

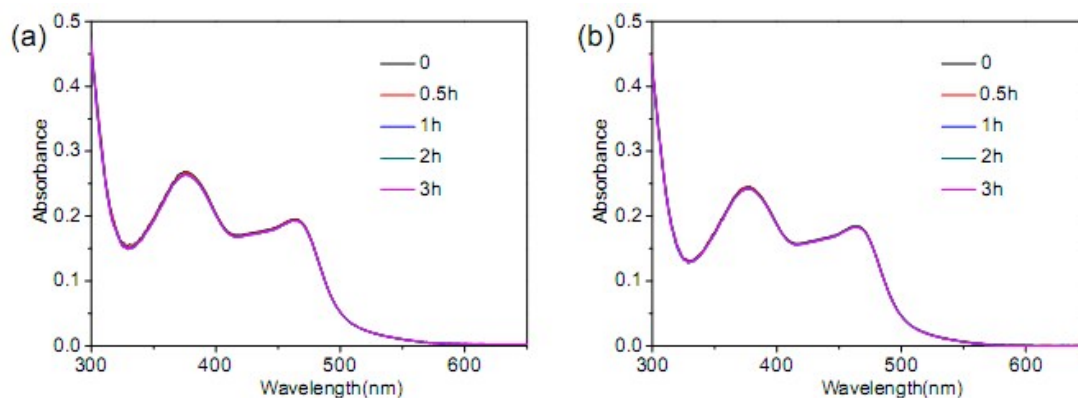

**Fig. S9.** Changes in the absorption spectra of complex 4 ( $10 \mu\text{M}$ ) under visible irradiation in the presence of CT-DNA (1 mM) at pH 7.0. a) Air-saturated solution, b) Argon-saturated solution. Irradiation:  $t = 0, 0.5, 1, 2, 3$  h.
